# Supplementary material
Source: PubMed Central journal article supplement (PMC3967115)
Supplement: supp_btt755_supplymentaryS1_nov27.xls.pdf [file supp_btt755_supplymentaryS1_nov27.xls.pdf]

| TCGA_ID      | BAT40 | TGFBII | BAT26 | BAT25 | D17S250 | D5S346 | D2S123 | Penta_D | Penta_E | 7_marker | 5_marker | #with_data | #somatic_MSI | MSIsensor | #somatic | annotation |
|--------------|-------|--------|-------|-------|---------|--------|--------|---------|---------|----------|----------|------------|--------------|-----------|----------|------------|
| TCGA-B5-A11H | 1     | 4      | 1     | 1     | 3       | 3      | 2      | 2       | 6       | MSI-H    | MSI-H    | 11175      | 4541         | 40.64     | 1017     |            |
| TCGA-AP-A0LT | 1     | 4      | 1     | 1     | 1       | 2      | 1      | 2       | 6       | MSI-H    | MSI-H    | 10348      | 3925         | 37.93     | 664      |            |
| TCGA-AX-A060 | 1     | 1      | 1     | 1     | 2       | 2      | 3      | 6       | 6       | MSI-H    | MSI-H    | 10802      | 4066         | 37.64     | 697      |            |
| TCGA-A5-A0GB | 1     | 4      | 1     | 1     | 2       | 2      | 1      | 2       | 6       | MSI-H    | MSI-H    | 11591      | 4316         | 37.24     | 714      |            |
| TCGA-AX-A063 | 1     | 4      | 1     | 1     | 1       | 2      | 2      | 6       | 2       | MSI-H    | MSI-H    | 10260      | 3603         | 35.12     | 986      |            |
| TCGA-AP-A0LD | 1     | 1      | 1     | 1     | 2       | 2      | 3      | 6       | 6       | MSI-H    | MSI-H    | 12335      | 4320         | 35.02     | 491      |            |
| TCGA-D1-A174 | 1     | 4      | 1     | 1     | 3       | 2      | 3      | 4       | 4       | MSI-H    | MSI-H    | 10135      | 3515         | 34.68     | 743      |            |
| TCGA-AP-A0LE | 1     | 4      | 1     | 1     | 2       | 2      | 3      | 2       | 6       | MSI-H    | MSI-H    | 9176       | 3032         | 33.04     | 518      |            |
| TCGA-AP-A054 | 1     | 4      | 1     | 1     | 2       | 2      | 1      | 4       | 2       | MSI-H    | MSI-H    | 10774      | 3557         | 33.01     | 1132     |            |
| TCGA-BS-A0TJ | 1     | 4      | 1     | 1     | 1       | 1      | 2      | 6       | 2       | MSI-H    | MSI-H    | 11145      | 3615         | 32.44     | 643      |            |
| TCGA-AX-A05S | 1     | 4      | 1     | 1     | 3       | 2      | 3      | 6       | 6       | MSI-H    | MSI-H    | 10791      | 3483         | 32.28     | 526      |            |
| TCGA-AP-A051 | 1     | 1      | 1     | 1     | 2       | 4      | 3      | 6       | 4       | MSI-H    | MSI-H    | 11036      | 3550         | 32.17     | 9105     |            |
| TCGA-AX-A0J1 | 1     | 4      | 1     | 1     | 3       | 2      | 1      | 6       | 2       | MSI-H    | MSI-H    | 10159      | 3154         | 31.05     | 5501     |            |
| TCGA-A5-A0GH | 1     | 1      | 1     | 1     | 1       | 3      | 1      | 6       | 6       | MSI-H    | MSI-H    | 10468      | 3230         | 30.86     | 438      |            |
| TCGA-D1-A177 | 1     | 4      | 1     | 1     | 2       | 2      | 3      | 2       | 6       | MSI-H    | MSI-H    | 9422       | 2861         | 30.37     | 776      |            |
| TCGA-D1-A163 | 1     | 4      | 1     | 1     | 3       | 3      | 2      | 2       | 2       | MSI-H    | MSI-H    | 10274      | 3109         | 30.26     | 546      |            |
| TCGA-D1-A17H | 1     | 4      | 1     | 1     | 3       | 1      | 3      | 1       | 6       | MSI-H    | MSI-H    | 8222       | 2455         | 29.86     | 620      |            |
| TCGA-B5-A0JZ | 1     | 4      | 1     | 1     | 3       | 2      | 3      | 6       | 6       | MSI-H    | MSI-H    | 11893      | 3547         | 29.82     | 480      |            |
| TCGA-BG-A0M4 | 1     | 4      | 1     | 1     | 2       | 2      | 3      | 2       | 4       | MSI-H    | MSI-H    | 9797       | 2851         | 29.1      | 460      |            |
| TCGA-BS-A0UM | 1     | 4      | 1     | 1     | 1       | 2      | 3      | 6       | 6       | MSI-H    | MSI-H    | 8699       | 2527         | 29.05     | 374      |            |
| TCGA-D1-A0ZS | 1     | 4      | 1     | 1     | 3       | 6      | 6      | 4       | 2       | MSI-H    | MSI-H    | 11953      | 3449         | 28.85     | 405      |            |
| TCGA-B5-A11G | 1     | 4      | 2     | 2     | 3       | 3      | 3      | 2       | 6       | MSI-H    | MSI-H    | 11203      | 3200         | 28.56     | 530      |            |
| TCGA-D1-A17U | 1     | 4      | 1     | 1     | 3       | 3      | 3      | 2       | 6       | MSI-H    | MSI-H    | 8713       | 2463         | 28.27     | 351      |            |
| TCGA-D1-A0ZO | 1     | 4      | 1     | 1     | 1       | 2      | 2      | 6       | 2       | MSI-H    | MSI-H    | 9979       | 2790         | 27.96     | 573      |            |
| TCGA-B5-A0JR | 1     | 4      | 1     | 1     | 3       | 6      | 3      | 1       | 5       | MSI-H    | MSI-H    | 10305      | 2815         | 27.32     | 623      |            |
| TCGA-B5-A11U | 1     | 4      | 1     | 1     | 3       | 3      | 3      | 6       | 6       | MSI-H    | MSI-H    | 11266      | 3075         | 27.29     | 341      |            |
| TCGA-BG-A0LX | 1     | 4      | 1     | 1     | 3       | 6      | 1      | 4       | 6       | MSI-H    | MSI-H    | 9891       | 2626         | 26.55     | 478      |            |
| TCGA-DI-A0WH | 1     | 4      | 1     | 1     | 2       | 2      | 3      | 6       | 4       | MSI-H    | MSI-H    | 8619       | 2234         | 25.92     | 517      |            |
| TCGA-A5-A0GW | 4     | 4      | 1     | 1     | 1       | 2      | 2      | 6       | 3       | MSI-H    | MSI-H    | 10444      | 2699         | 25.84     | 315      |            |
| TCGA-AP-A0LG | 1     | 4      | 1     | 2     | 2       | 4      | 2      | 6       | 6       | MSI-H    | MSI-H    | 11393      | 2898         | 25.44     | 410      |            |
| TCGA-D1-A167 | 1     | 4      | 1     | 1     | 6       | 6      | 5      | 3       | 2       | MSI-H    | MSI-H    | 8531       | 2102         | 24.64     | 1959     |            |
| TCGA-AX-A06H | 1     | 4      | 1     | 1     | 2       | 3      | 3      | 2       | 6       | MSI-H    | MSI-H    | 11074      | 2677         | 24.17     | 409      |            |
| TCGA-BS-A0U8 | 1     | 4      | 1     | 1     | 2       | 5      | 2      | 6       | 1       | MSI-H    | MSI-H    | 10743      | 2568         | 23.9      | 404      |            |
| TCGA-B5-A11J | 1     | 4      | 1     | 1     | 3       | 2      | 3      | 6       | 6       | MSI-H    | MSI-H    | 10788      | 2556         | 23.69     | 444      |            |
| TCGA-BG-A18B | 1     | 4      | 1     | 1     | 4       | 2      | 6      | 3       | 6       | MSI-H    | MSI-H    | 9061       | 2113         | 23.32     | 356      |            |
| TCGA-B5-A0JV | 1     | 4      | 1     | 1     | 2       | 2      | 1      | 6       | 2       | MSI-H    | MSI-H    | 11180      | 2580         | 23.08     | 291      |            |
| TCGA-BG-A0VZ | 1     | 4      | 1     | 1     | 3       | 5      | 3      | 6       | 6       | MSI-H    | MSI-H    | 7372       | 1690         | 22.92     | 339      |            |
| TCGA-B5-A0K9 | 1     | 1      | 1     | 1     | 3       | 3      | 1      | 2       | 6       | MSI-H    | MSI-H    | 8463       | 1932         | 22.83     | 738      |            |
| TCGA-BG-A0MQ | 1     | 4      | 1     | 1     | 1       | 6      | 1      | 6       | 5       | MSI-H    | MSI-H    | 8178       | 1862         | 22.77     | 606      |            |
| TCGA-D1-A16F | 1     | 4      | 1     | 1     | 3       | 2      | 3      | 2       | 2       | MSI-H    | MSI-H    | 10375      | 2347         | 22.62     | 406      |            |
| TCGA-A5-A0G9 | 1     | 4      | 1     | 1     | 1       | 3      | 5      | 3       | 6       | MSI-H    | MSI-H    | 10130      | 2229         | 22        | 259      |            |
| TCGA-D1-A160 | 1     | 4      | 1     | 1     | 6       | 2      | 3      | 2       | 4       | MSI-H    | MSI-H    | 9547       | 2077         | 21.76     | 484      |            |
| TCGA-BK-A0C9 | 1     | 4      | 1     | 1     | 2       | 3      | 3      | 6       | 6       | MSI-H    | MSI-H    | 10608      | 2305         | 21.73     | 466      |            |
| TCGA-BS-A0TA | 1     | 1      | 1     | 1     | 3       | 1      | 4      | 6       | 5       | MSI-H    | MSI-H    | 7195       | 1364         | 18.96     | 414      |            |
| TCGA-D1-A176 | 1     | 4      | 1     | 1     | 1       | 2      | 3      | 2       | 6       | MSI-H    | MSI-H    | 9033       | 1690         | 18.71     | 375      |            |
| TCGA-BG-A0VW | 1     | 4      | 1     | 1     | 3       | 5      | 2      | 6       | 6       | MSI-H    | MSI-H    | 10471      | 1941         | 18.54     | 325      |            |
| TCGA-B5-A0K6 | 3     | 1      | 4     | 1     | 3       | 1      | 1      | 6       | 3       | MSI-H    | MSI-H    | 10530      | 1895         | 18        | 240      |            |
| TCGA-D1-A17D | 1     | 4      | 1     | 1     | 2       | 3      | 2      | 2       | 6       | MSI-H    | MSI-H    | 7977       | 1434         | 17.98     | 502      |            |
| TCGA-AP-A0LP | 1     | 4      | 1     | 1     | 2       | 5      | 1      | 6       | 6       | MSI-H    | MSI-H    | 9758       | 1728         | 17.71     | 276      |            |
| TCGA-BS-A0UA | 1     | 4      | 1     | 1     | 1       | 1      | 2      | 3       | 6       | MSI-H    | MSI-H    | 10330      | 1801         | 17.43     | 327      |            |
| TCGA-A5-A0GA | 1     | 4      | 1     | 4     | 3       | 1      | 3      | 5       | 4       | MSI-H    | MSI-H    | 12041      | 2068         | 17.17     | 306      |            |
| TCGA-D1-A101 | 1     | 4      | 1     | 1     | 3       | 1      | 3      | 4       | 6       | MSI-H    | MSI-H    | 10095      | 1721         | 17.05     | 284      |            |
| TCGA-AX-A064 | 1     | 1      | 1     | 1     | 6       | 2      | 1      | 6       | 4       | MSI-H    | MSI-H    | 9957       | 1657         | 16.64     | 261      |            |
| TCGA-D1-A17M | 1     | 4      | 1     | 1     | 3       | 3      | 2      | 6       | 6       | MSI-H    | MSI-H    | 10121      | 1644         | 16.24     | 412      |            |
| TCGA-A5-A0VQ | 1     | 4      | 1     | 1     | 1       | 1      | 2      | 6       | 2       | MSI-H    | MSI-H    | 7131       | 1096         | 15.37     | 395      |            |
| TCGA-A5-A0GI | 1     | 4      | 1     | 2     | 2       | 2      | 1      | 6       | 6       | MSI-H    | MSI-H    | 9642       | 1421         | 14.74     | 261      |            |
| TCGA-BS-A0TE | 1     | 1      | 1     | 1     | 1       | 3      | 2      | 5       | 6       | MSI-H    | MSI-H    | 8999       | 1270         | 14.11     | 342      |            |
| TCGA-A5-A0VP | 1     | 4      | 1     | 1     | 2       | 6      | 2      | 6       | 6       | MSI-H    | MSI-H    | 9089       | 1195         | 13.15     | 1614     |            |
| TCGA-BS-A0UL | 1     | 4      | 1     | 1     | 3       | 6      | 4      | 4       | 3       | MSI-H    | MSI-H    | 8856       | 1154         | 13.03     | 399      |            |
| TCGA-AX-A05Y | 2     | 4      | 1     | 1     | 3       | 6      | 3      | 6       | 4       | MSI-H    | MSI-H    | 10685      | 1360         | 12.73     | 177      |            |
| TCGA-AP-A05N | 1     | 4      | 1     | 1     | 2       | 3      | 1      | 6       | 6       | MSI-H    | MSI-H    | 11715      | 1465         | 12.51     | 218      |            |
| TCGA-D1-A17A | 4     | 4      | 1     | 1     | 3       | 2      | 6      | 6       | 2       | MSI-H    | MSI-H    | 8197       | 1001         | 12.21     | 239      |            |
| TCGA-D1-A15X | 1     | 4      | 4     | 1     | 6       | 6      | 6      | 6       | 6       | MSI-L    | MSI-L    | 10223      | 1172         | 11.46     | 1886     |            |
| TCGA-B5-A0K2 | 1     | 4      | 4     | 1     | 2       | 6      | 3      | 6       | 2       | MSI-H    | MSI-H    | 7971       | 860          | 10.79     | 269      |            |
| TCGA-D1-A17R | 1     | 4      | 1     | 1     | 1       | 1      | 3      | 4       | 4       | MSI-H    | MSI-H    | 10319      | 1069         | 10.36     | 176      |            |
| TCGA-BG-A0M0 | 1     | 4      | 1     | 1     | 2       | 6      | 3      | 6       | 2       | MSI-H    | MSI-H    | 9462       | 919          | 9.71      | 147      |            |
| TCGA-BS-A0UJ | 1     | 4      | 1     | 1     | 1       | 6      | 3      | 6       | 3       | MSI-H    | MSI-H    | 7451       | 385          | 5.17      | 1987     |            |
| TCGA-D1-A17B | 6     | 4      | 1     | 3     | 1       | 6      | 3      | 6       | 6       | MSI-H    | MSI-H    | 7715       | 391          | 5.07      | 276      |            |
| TCGA-D1-A17F | 1     | 4      | 1     | 1     | 2       | 6      | 2      | 4       | 6       | MSI-H    | MSI-H    | 9136       | 425          | 4.65      | 235      |            |
| TCGA-D1-A103 | 4     | 4      | 1     | 4     | 2       | 6      | 4      | 6       | 2       | MSI-L    | MSI-H    | 7344       | 326          | 4.44      | 8160     |            |
| TCGA-B5-A11Y | 1     | 4      | 1     | 4     | 6       | 6      | 6      | 6       | 6       | MSI-L    | MSI-L    | 7395       | 314          | 4.25      | 1167     |            |
| TCGA-D1-A16N | 1     | 4      | 1     | 3     | 3       | 5      | 3      | 6       | 5       | MSI-H    | MSI-H    | 9007       | 363          | 4.03      | 126      |            |
| TCGA-AP-A059 | 1     | 4      | 1     | 1     | 6       | 6      | 1      | 6       | 6       | MSI-H    | MSI-H    | 10400      | 370          | 3.56      | 12424    |            |
| TCGA-AP-A0LM | 4     | 4      | 4     | 4     | 4       | 6      | 6      | 6       | 6       | MSS      | MSS      | 9833       | 344          | 3.5       | 14394    |            |
| TCGA-BS-A0U7 | 4     | 4      | 1     | 4     | 6       | 6      | 1      | 4       | 2       | MSI-L    | MSI-H    | 11417      | 379          | 3.32      | 169      |            |
| TCGA-BK-A0CC | 4     | 4      | 6     | 4     | 6       | 5      | 5      | 5       | 4       | MSS      | MSS      | 9059       | 201          | 2.22      | 47       |            |
| TCGA-AP-A05H | 4     | 4      | 4     | 6     | 5       | 5      | 6      | 4       | 6       | MSS      | MSS      | 7168       | 156          | 2.18      | 79       |            |
| TCGA-BG-A0MS | 4     | 4      | 4     | 4     | 6       | 6      | 6      | 6       | 6       | MSS      | MSS      | 5860       | 125          | 2.13      | 52       |            |
| TCGA-BG-A18C | 4     | 4      | 4     | 4     | 5       | 6      | 4      | 5       | 5       | MSS      | MSS      | 9745       | 195          | 2         | 52       |            |
| TCGA-AP-A0L9 | 4     | 4      | 4     | 6     | 5       | 4      | 6      | 4       | 6       | MSS      | MSS      | 9758       | 191          | 1.96      | 69       |            |

|              |   |   |   |   |   |   |   |   |         |       |       |     |      |       |
|--------------|---|---|---|---|---|---|---|---|---------|-------|-------|-----|------|-------|
| TCGA-AP-A0L8 | 4 | 4 | 4 | 4 | 5 | 5 | 6 | 5 | 5 MSS   | MSS   | 8786  | 148 | 1.68 | 68    |
| TCGA-AP-A056 | 6 | 4 | 4 | 4 | 2 | 6 | 6 | 4 | 6 MSI-L | MSI-L | 11610 | 190 | 1.64 | 9376  |
| TCGA-D1-A0ZZ | 4 | 4 | 4 | 4 | 5 | 5 | 6 | 5 | 5 MSS   | MSS   | 9393  | 124 | 1.32 | 75    |
| TCGA-BK-A139 | 4 | 4 | 4 | 4 | 5 | 5 | 6 | 4 | 6 MSS   | MSS   | 10280 | 122 | 1.19 | 102   |
| TCGA-A5-A0G3 | 4 | 4 | 4 | 4 | 5 | 5 | 6 | 6 | 6 MSS   | MSS   | 10285 | 118 | 1.15 | 40    |
| TCGA-AX-A2H5 | 4 | 4 | 4 | 4 | 5 | 6 | 6 | 5 | 5 MSS   | MSS   | 5426  | 62  | 1.14 | 56    |
| TCGA-EY-A1GS | 4 | 4 | 4 | 5 | 6 | 6 | 5 | 6 | 6 MSS   | MSS   | 6347  | 66  | 1.04 | 281   |
| TCGA-B5-A11I | 4 | 4 | 4 | 4 | 6 | 4 | 6 | 6 | 6 MSS   | MSS   | 7491  | 75  | 1    | 51    |
| TCGA-B5-A0JY | 4 | 4 | 4 | 4 | 6 | 4 | 6 | 4 | 6 MSS   | MSS   | 9866  | 93  | 0.94 | 11387 |
| TCGA-AX-A0IW | 6 | 4 | 4 | 4 | 5 | 5 | 1 | 6 | 6 MSI-L | MSI-L | 10090 | 94  | 0.93 | 54    |
| TCGA-D1-A16S | 4 | 4 | 4 | 4 | 6 | 4 | 6 | 6 | 5 MSS   | MSS   | 11391 | 100 | 0.88 | 52    |
| TCGA-D1-A17Q | 1 | 4 | 4 | 4 | 2 | 6 | 4 | 4 | 6 MSI-L | MSI-L | 9728  | 82  | 0.84 | 6599  |
| TCGA-BS-A0UF | 4 | 4 | 4 | 4 | 5 | 6 | 6 | 6 | 6 MSS   | MSS   | 8949  | 71  | 0.79 | 9222  |
| TCGA-BS-A0TI | 4 | 4 | 4 | 4 | 5 | 6 | 5 | 6 | 6 MSS   | MSS   | 8188  | 64  | 0.78 | 93    |
| TCGA-A5-A0GN | 6 | 4 | 4 | 4 | 6 | 6 | 5 | 6 | 6 MSS   | MSS   | 9922  | 73  | 0.74 | 59    |
| TCGA-D1-A15V | 4 | 4 | 4 | 4 | 5 | 6 | 4 | 5 | 6 MSS   | MSS   | 10782 | 77  | 0.71 | 45    |
| TCGA-BG-A0M2 | 4 | 4 | 4 | 4 | 6 | 5 | 4 | 6 | 6 MSS   | MSS   | 9760  | 67  | 0.69 | 37    |
| TCGA-A5-A0G5 | 4 | 4 | 4 | 4 | 2 | 4 | 6 | 4 | 6 MSI-L | MSI-L | 11667 | 79  | 0.68 | 129   |
| TCGA-D1-A16I | 4 | 4 | 4 | 4 | 5 | 5 | 6 | 6 | 6 MSS   | MSS   | 9620  | 65  | 0.68 | 44    |
| TCGA-AP-A0LF | 4 | 4 | 4 | 4 | 5 | 6 | 4 | 6 | 6 MSS   | MSS   | 11527 | 74  | 0.64 | 222   |
| TCGA-B5-A0K3 | 6 | 4 | 4 | 4 | 6 | 6 | 6 | 6 | 5 MSS   | MSS   | 10589 | 66  | 0.62 | 50    |
| TCGA-BG-A0M6 | 4 | 4 | 4 | 4 | 6 | 5 | 4 | 5 | 5 MSS   | MSS   | 4801  | 30  | 0.62 | 48    |
| TCGA-D1-A17K | 6 | 4 | 4 | 4 | 5 | 6 | 6 | 6 | 5 MSS   | MSS   | 7698  | 42  | 0.55 | 62    |
| TCGA-B5-A0JN | 5 | 4 | 4 | 4 | 6 | 5 | 3 | 5 | 6 MSI-L | MSI-L | 7761  | 42  | 0.54 | 121   |
| TCGA-B5-A11F | 4 | 4 | 4 | 4 | 6 | 4 | 6 | 6 | 6 MSS   | MSS   | 8177  | 43  | 0.53 | 52    |
| TCGA-AJ-A23M | 4 | 4 | 4 | 4 | 4 | 6 | 6 | 5 | 5 MSS   | MSS   | 6389  | 33  | 0.52 | 119   |
| TCGA-B5-A1MY | 4 | 4 | 4 | 4 | 5 | 4 | 5 | 5 | 6 MSS   | MSS   | 5334  | 28  | 0.52 | 53    |
| TCGA-AX-A1C7 | 4 | 4 | 4 | 4 | 6 | 6 | 6 | 6 | 2 MSS   | MSS   | 5765  | 29  | 0.5  | 53    |
| TCGA-D1-A1NU | 4 | 4 | 4 | 4 | 5 | 5 | 4 | 4 | 5 MSS   | MSS   | 6925  | 32  | 0.46 | 91    |
| TCGA-AX-A2HF | 4 | 4 | 4 | 4 | 5 | 5 | 5 | 5 | 6 MSS   | MSS   | 5246  | 23  | 0.44 | 40    |
| TCGA-B5-A11Q | 4 | 4 | 4 | 4 | 6 | 6 | 6 | 6 | 6 MSS   | MSS   | 10406 | 44  | 0.42 | 52    |
| TCGA-AX-A05T | 4 | 4 | 4 | 4 | 6 | 6 | 6 | 6 | 6 MSS   | MSS   | 10344 | 41  | 0.4  | 59    |
| TCGA-E6-A1LZ | 4 | 4 | 4 | 4 | 5 | 6 | 6 | 6 | 5 MSS   | MSS   | 7537  | 30  | 0.4  | 213   |
| TCGA-B5-A11R | 6 | 4 | 4 | 4 | 6 | 6 | 6 | 6 | 6 MSS   | MSS   | 11707 | 44  | 0.38 | 717   |
| TCGA-D1-A16Y | 1 | 4 | 4 | 1 | 6 | 6 | 6 | 6 | 6 MSI-L | MSI-L | 9855  | 37  | 0.38 | 1226  |
| TCGA-AP-A053 | 4 | 4 | 4 | 4 | 5 | 6 | 6 | 6 | 5 MSS   | MSS   | 9187  | 34  | 0.37 | 56    |
| TCGA-BG-A0MG | 4 | 4 | 4 | 4 | 6 | 6 | 4 | 4 | 6 MSS   | MSS   | 10756 | 40  | 0.37 | 121   |
| TCGA-D1-A102 | 4 | 4 | 4 | 4 | 4 | 4 | 4 | 4 | 6 MSS   | MSS   | 8987  | 33  | 0.37 | 56    |
| TCGA-B5-A0K8 | 4 | 4 | 4 | 4 | 6 | 6 | 6 | 4 | 5 MSS   | MSS   | 6033  | 22  | 0.36 | 55    |
| TCGA-BG-A0W1 | 4 | 4 | 4 | 4 | 6 | 6 | 6 | 6 | 6 MSS   | MSS   | 8265  | 30  | 0.36 | 81    |
| TCGA-EY-A212 | 4 | 4 | 4 | 4 | 5 | 6 | 6 | 3 | 5 MSS   | MSS   | 6924  | 25  | 0.36 | 69    |
| TCGA-BS-A0U9 | 6 | 4 | 4 | 4 | 5 | 5 | 6 | 6 | 5 MSS   | MSS   | 8642  | 30  | 0.35 | 42    |
| TCGA-AX-A05Z | 4 | 4 | 4 | 6 | 4 | 6 | 6 | 6 | 6 MSS   | MSS   | 10828 | 37  | 0.34 | 7084  |
| TCGA-BS-A0V8 | 4 | 4 | 4 | 4 | 5 | 6 | 4 | 6 | 6 MSS   | MSS   | 10748 | 37  | 0.34 | 87    |
| TCGA-AP-A05J | 4 | 4 | 4 | 4 | 5 | 6 | 6 | 6 | 6 MSS   | MSS   | 9926  | 33  | 0.33 | 53    |
| TCGA-A5-A0R7 | 4 | 4 | 4 | 4 | 5 | 5 | 6 | 6 | 5 MSS   | MSS   | 8814  | 28  | 0.32 | 54    |
| TCGA-BK-A13C | 4 | 4 | 4 | 6 | 6 | 6 | 6 | 6 | 6 MSS   | MSS   | 10015 | 32  | 0.32 | 50    |
| TCGA-EO-A1Y8 | 4 | 4 | 4 | 4 | 5 | 6 | 6 | 6 | 6 MSS   | MSS   | 5638  | 18  | 0.32 | 68    |
| TCGA-BG-A0MI | 6 | 4 | 4 | 4 | 4 | 6 | 4 | 6 | 6 MSS   | MSS   | 10045 | 29  | 0.29 | 67    |
| TCGA-A5-A0GJ | 4 | 4 | 4 | 4 | 5 | 6 | 6 | 6 | 4 MSS   | MSS   | 7529  | 21  | 0.28 | 86    |
| TCGA-AP-A052 | 4 | 4 | 4 | 4 | 5 | 6 | 4 | 6 | 6 MSS   | MSS   | 10247 | 29  | 0.28 | 32    |
| TCGA-D1-A0ZQ | 4 | 4 | 6 | 4 | 6 | 6 | 6 | 6 | 3 MSS   | MSS   | 10366 | 28  | 0.27 | 97    |
| TCGA-AP-A0LH | 4 | 4 | 4 | 6 | 6 | 6 | 6 | 6 | 6 MSS   | MSS   | 13318 | 34  | 0.26 | 122   |
| TCGA-AP-A0LI | 4 | 4 | 4 | 4 | 4 | 5 | 6 | 4 | 6 MSS   | MSS   | 12074 | 31  | 0.26 | 96    |
| TCGA-AX-A06B | 4 | 4 | 4 | 4 | 6 | 5 | 6 | 6 | 5 MSS   | MSS   | 9615  | 25  | 0.26 | 44    |
| TCGA-EO-A1Y5 | 5 | 4 | 4 | 4 | 5 | 4 | 5 | 5 | 5 MSS   | MSS   | 6537  | 17  | 0.26 | 84    |
| TCGA-B5-A11W | 4 | 4 | 4 | 4 | 6 | 6 | 4 | 6 | 6 MSS   | MSS   | 10917 | 27  | 0.25 | 79    |
| TCGA-BG-A0M8 | 6 | 4 | 4 | 4 | 5 | 4 | 4 | 4 | 6 MSS   | MSS   | 11045 | 28  | 0.25 | 67    |
| TCGA-BG-A0MT | 4 | 4 | 4 | 4 | 6 | 6 | 6 | 4 | 6 MSS   | MSS   | 10606 | 26  | 0.25 | 53    |
| TCGA-AP-A0LL | 4 | 4 | 4 | 6 | 6 | 6 | 6 | 6 | 2 MSS   | MSS   | 8500  | 20  | 0.24 | 53    |
| TCGA-B5-A0K4 | 4 | 4 | 4 | 4 | 4 | 6 | 6 | 6 | 6 MSS   | MSS   | 11459 | 27  | 0.24 | 61    |
| TCGA-D1-A0ZP | 4 | 4 | 4 | 4 | 5 | 6 | 2 | 6 | 6 MSI-L | MSI-L | 7384  | 18  | 0.24 | 40    |
| TCGA-AP-A05A | 4 | 4 | 4 | 4 | 5 | 6 | 4 | 6 | 6 MSS   | MSS   | 11308 | 26  | 0.23 | 80    |
| TCGA-AX-A0IU | 6 | 4 | 4 | 4 | 5 | 6 | 5 | 4 | 6 MSS   | MSS   | 9629  | 22  | 0.23 | 54    |
| TCGA-A5-A0R9 | 4 | 4 | 4 | 4 | 6 | 6 | 6 | 6 | 4 MSS   | MSS   | 7665  | 17  | 0.22 | 48    |
| TCGA-AP-A05D | 4 | 4 | 4 | 4 | 5 | 4 | 4 | 5 | 6 MSS   | MSS   | 9725  | 21  | 0.22 | 37    |
| TCGA-BG-A0M7 | 4 | 4 | 4 | 4 | 5 | 4 | 6 | 6 | 6 MSS   | MSS   | 11249 | 25  | 0.22 | 61    |
| TCGA-D1-A161 | 4 | 4 | 4 | 4 | 6 | 6 | 6 | 6 | 6 MSS   | MSS   | 10393 | 23  | 0.22 | 99    |
| TCGA-D1-A17L | 4 | 4 | 4 | 4 | 6 | 6 | 4 | 6 | 6 MSS   | MSS   | 8817  | 19  | 0.22 | 71    |
| TCGA-B5-A11S | 4 | 4 | 4 | 4 | 6 | 6 | 4 | 6 | 6 MSS   | MSS   | 11288 | 24  | 0.21 | 54    |
| TCGA-BG-A0LW | 4 | 4 | 4 | 4 | 6 | 4 | 4 | 6 | 6 MSS   | MSS   | 11800 | 25  | 0.21 | 34    |
| TCGA-BG-A0MU | 4 | 4 | 4 | 4 | 6 | 6 | 4 | 4 | 6 MSS   | MSS   | 10059 | 20  | 0.2  | 77    |
| TCGA-BS-A0TC | 4 | 4 | 4 | 4 | 6 | 4 | 6 | 6 | 6 MSS   | MSS   | 8173  | 16  | 0.2  | 1480  |
| TCGA-B5-A11Z | 4 | 4 | 4 | 4 | 6 | 6 | 6 | 6 | 6 MSS   | MSS   | 8102  | 15  | 0.19 | 67    |
| TCGA-BG-A0YV | 4 | 4 | 4 | 4 | 6 | 4 | 6 | 4 | 6 MSS   | MSS   | 8985  | 17  | 0.19 | 88    |
| TCGA-D1-A0ZU | 4 | 4 | 4 | 4 | 6 | 4 | 6 | 6 | 6 MSS   | MSS   | 9013  | 17  | 0.19 | 43    |
| TCGA-AX-A062 | 4 | 4 | 4 | 4 | 6 | 6 | 6 | 6 | 6 MSS   | MSS   | 10971 | 20  | 0.18 | 36    |
| TCGA-BS-A0U5 | 4 | 4 | 4 | 4 | 6 | 6 | 6 | 6 | 6 MSS   | MSS   | 8452  | 15  | 0.18 | 74    |
| TCGA-D1-A17S | 4 | 4 | 4 | 4 | 6 | 6 | 6 | 6 | 6 MSS   | MSS   | 8990  | 16  | 0.18 | 46    |
| TCGA-D1-A1NX | 4 | 4 | 4 | 4 | 6 | 6 | 4 | 6 | 6 MSS   | MSS   | 7266  | 13  | 0.18 | 54    |
| TCGA-AP-A1DQ | 4 | 4 | 4 | 4 | 6 | 6 | 6 | 4 | 4 MSS   | MSS   | 5827  | 10  | 0.17 | 34    |

|              |   |   |   |   |   |   |   |   |         |       |       |    |      |                               |
|--------------|---|---|---|---|---|---|---|---|---------|-------|-------|----|------|-------------------------------|
| TCGA-B5-A11V | 4 | 4 | 4 | 4 | 4 | 6 | 6 | 6 | 4 MSS   | MSS   | 8172  | 14 | 0.17 | 65                            |
| TCGA-B5-A121 | 4 | 4 | 4 | 4 | 6 | 6 | 6 | 4 | 6 MSS   | MSS   | 10877 | 18 | 0.17 | 35                            |
| TCGA-BG-A0M9 | 4 | 4 | 4 | 4 | 6 | 6 | 6 | 4 | 6 MSS   | MSS   | 9660  | 16 | 0.17 | 60                            |
| TCGA-BS-A0UT | 4 | 4 | 4 | 4 | 6 | 6 | 5 | 6 | 6 MSS   | MSS   | 8032  | 14 | 0.17 | 49                            |
| TCGA-D1-A0ZN | 4 | 4 | 4 | 4 | 6 | 6 | 4 | 6 | 4 MSS   | MSS   | 9660  | 16 | 0.17 | 51                            |
| TCGA-BG-A0RY | 4 | 4 | 4 | 4 | 6 | 4 | 5 | 6 | 6 MSS   | MSS   | 10394 | 17 | 0.16 | 61                            |
| TCGA-BG-A0VT | 4 | 4 | 4 | 4 | 6 | 6 | 4 | 6 | 6 MSS   | MSS   | 8869  | 14 | 0.16 | 37                            |
| TCGA-D1-A168 | 4 | 4 | 4 | 4 | 6 | 6 | 5 | 6 | 6 MSS   | MSS   | 8861  | 14 | 0.16 | 64                            |
| TCGA-B5-A0K7 | 4 | 4 | 4 | 4 | 6 | 4 | 4 | 6 | 6 MSS   | MSS   | 9674  | 14 | 0.14 | 54                            |
| TCGA-A5-A0GP | 4 | 4 | 4 | 4 | 6 | 6 | 6 | 6 | 6 MSS   | MSS   | 11047 | 14 | 0.13 | 1627                          |
| TCGA-AX-A1C8 | 4 | 4 | 4 | 4 | 5 | 6 | 6 | 6 | 6 MSS   | MSS   | 5415  | 7  | 0.13 | 64                            |
| TCGA-A5-A0GV | 4 | 4 | 4 | 4 | 6 | 6 | 4 | 6 | 6 MSS   | MSS   | 10925 | 13 | 0.12 | 56                            |
| TCGA-D1-A17T | 4 | 4 | 4 | 4 | 6 | 6 | 4 | 4 | 6 MSS   | MSS   | 8554  | 10 | 0.12 | 71                            |
| TCGA-FI-A2EX | 4 | 4 | 4 | 4 | 4 | 6 | 4 | 4 | 5 MSS   | MSS   | 4330  | 5  | 0.12 | 66                            |
| TCGA-A5-A0GE | 4 | 4 | 4 | 4 | 4 | 4 | 6 | 6 | 5 MSS   | MSS   | 10648 | 12 | 0.11 | 32                            |
| TCGA-B5-A0JT | 4 | 4 | 4 | 4 | 6 | 4 | 5 | 6 | 6 MSS   | MSS   | 10287 | 11 | 0.11 | 62                            |
| TCGA-D1-A16J | 4 | 4 | 4 | 4 | 6 | 4 | 6 | 6 | 6 MSS   | MSS   | 10278 | 11 | 0.11 | 234                           |
| TCGA-AP-A0LN | 6 | 4 | 4 | 4 | 6 | 6 | 6 | 6 | 6 MSS   | MSS   | 11013 | 11 | 0.1  | 57                            |
| TCGA-AX-A0IS | 4 | 4 | 4 | 4 | 6 | 5 | 6 | 6 | 6 MSS   | MSS   | 9134  | 8  | 0.09 | 66                            |
| TCGA-BG-A187 | 4 | 4 | 4 | 1 | 6 | 6 | 4 | 6 | 4 MSI-L | MSI-L | 7739  | 7  | 0.09 | 106                           |
| TCGA-A5-A0GD | 1 | 4 | 1 | 1 | 2 | 4 | 1 | 4 | 2 MSI-H | MSI-H | 8388  | 7  | 0.08 | 4 flagged as to be excluded l |
| TCGA-D1-A0ZR | 4 | 4 | 4 | 4 | 6 | 6 | 6 | 6 | 4 MSS   | MSS   | 8465  | 7  | 0.08 | 60                            |
| TCGA-D1-A15Z | 4 | 4 | 4 | 4 | 3 | 6 | 6 | 6 | 6 MSI-L | MSI-L | 10802 | 9  | 0.08 | 86                            |
| TCGA-D1-A16O | 4 | 4 | 4 | 4 | 6 | 6 | 6 | 4 | 6 MSS   | MSS   | 9431  | 8  | 0.08 | 41                            |
| TCGA-A5-A0R8 | 4 | 4 | 4 | 4 | 6 | 6 | 6 | 6 | 6 MSS   | MSS   | 7029  | 5  | 0.07 | 92                            |
| TCGA-AP-A0LQ | 4 | 4 | 4 | 4 | 6 | 6 | 6 | 6 | 6 MSS   | MSS   | 8407  | 6  | 0.07 | 57                            |
| TCGA-AX-A05U | 4 | 4 | 4 | 4 | 6 | 4 | 6 | 6 | 6 MSS   | MSS   | 9892  | 7  | 0.07 | 41                            |
| TCGA-BG-A186 | 4 | 4 | 4 | 4 | 6 | 6 | 4 | 6 | 6 MSS   | MSS   | 9080  | 6  | 0.07 | 36                            |
| TCGA-D1-A169 | 4 | 4 | 4 | 4 | 5 | 6 | 6 | 4 | 6 MSS   | MSS   | 9880  | 7  | 0.07 | 55                            |
| TCGA-B5-A0K1 | 4 | 4 | 4 | 4 | 4 | 4 | 6 | 6 | 6 MSS   | MSS   | 11880 | 7  | 0.06 | 59                            |
| TCGA-BG-A0M3 | 4 | 4 | 4 | 4 | 6 | 6 | 6 | 6 | 4 MSS   | MSS   | 8552  | 5  | 0.06 | 76                            |
| TCGA-BG-A0VX | 4 | 4 | 4 | 4 | 6 | 6 | 6 | 6 | 6 MSS   | MSS   | 9760  | 6  | 0.06 | 221                           |
| TCGA-BK-A0CB | 4 | 4 | 4 | 4 | 6 | 6 | 4 | 6 | 6 MSS   | MSS   | 7892  | 5  | 0.06 | 78                            |
| TCGA-D1-A16D | 4 | 4 | 6 | 4 | 6 | 6 | 6 | 6 | 4 MSS   | MSS   | 10085 | 6  | 0.06 | 49                            |
| TCGA-FI-A2D2 | 4 | 4 | 4 | 4 | 4 | 5 | 4 | 5 | 4 MSS   | MSS   | 5146  | 3  | 0.06 | 46                            |
| TCGA-A5-A0GM | 4 | 4 | 4 | 4 | 4 | 4 | 6 | 4 | 4 MSS   | MSS   | 11322 | 6  | 0.05 | 39                            |
| TCGA-AP-A0LV | 6 | 4 | 4 | 4 | 6 | 6 | 6 | 6 | 6 MSS   | MSS   | 10746 | 5  | 0.05 | 30                            |
| TCGA-BG-A0MC | 4 | 4 | 4 | 4 | 6 | 6 | 6 | 4 | 6 MSS   | MSS   | 10983 | 6  | 0.05 | 60                            |
| TCGA-BG-A0W2 | 4 | 4 | 4 | 4 | 6 | 6 | 6 | 6 | 6 MSS   | MSS   | 8496  | 4  | 0.05 | 49                            |
| TCGA-D1-A16E | 6 | 4 | 4 | 4 | 6 | 4 | 4 | 6 | 6 MSS   | MSS   | 10164 | 5  | 0.05 | 69                            |
| TCGA-A5-A0R6 | 4 | 4 | 4 | 4 | 5 | 6 | 4 | 5 | 6 MSS   | MSS   | 8335  | 3  | 0.04 | 42                            |
| TCGA-AP-A0LO | 4 | 4 | 4 | 4 | 6 | 4 | 6 | 4 | 6 MSS   | MSS   | 10370 | 4  | 0.04 | 37                            |
| TCGA-BG-A0MO | 4 | 4 | 4 | 4 | 6 | 6 | 4 | 6 | 6 MSS   | MSS   | 10446 | 4  | 0.04 | 49                            |
| TCGA-D1-A15W | 4 | 4 | 4 | 4 | 6 | 6 | 6 | 6 | 6 MSS   | MSS   | 11138 | 4  | 0.04 | 80                            |
| TCGA-D1-A16R | 4 | 4 | 4 | 4 | 6 | 6 | 4 | 6 | 6 MSS   | MSS   | 10348 | 4  | 0.04 | 45                            |
| TCGA-A5-A0RA | 4 | 4 | 4 | 4 | 6 | 6 | 4 | 6 | 6 MSS   | MSS   | 9070  | 3  | 0.03 | 84                            |
| TCGA-AX-A06L | 4 | 4 | 4 | 4 | 6 | 6 | 6 | 6 | 6 MSS   | MSS   | 10646 | 3  | 0.03 | 42                            |
| TCGA-AX-A1CP | 4 | 4 | 4 | 4 | 5 | 6 | 6 | 6 | 6 MSS   | MSS   | 6906  | 2  | 0.03 | 29                            |
| TCGA-B5-A0K0 | 4 | 4 | 4 | 4 | 4 | 6 | 4 | 6 | 6 MSS   | MSS   | 10715 | 3  | 0.03 | 24                            |
| TCGA-B5-A1MU | 4 | 4 | 4 | 4 | 6 | 6 | 6 | 4 | 4 MSS   | MSS   | 7146  | 2  | 0.03 | 27                            |
| TCGA-BG-A18A | 4 | 4 | 4 | 4 | 6 | 4 | 6 | 6 | 6 MSS   | MSS   | 7765  | 2  | 0.03 | 74                            |
| TCGA-BS-A0WQ | 6 | 4 | 4 | 4 | 6 | 4 | 6 | 4 | 6 MSS   | MSS   | 9345  | 3  | 0.03 | 59                            |
| TCGA-FI-A2F8 | 4 | 4 | 4 | 4 | 4 | 5 | 6 | 5 | 6 MSS   | MSS   | 5938  | 2  | 0.03 | 78                            |
| TCGA-A5-A0GX | 4 | 4 | 4 | 4 | 6 | 6 | 6 | 1 | 6 MSS   | MSS   | 8806  | 2  | 0.02 | 41                            |
| TCGA-AP-A05P | 4 | 4 | 4 | 4 | 6 | 6 | 6 | 4 | 6 MSS   | MSS   | 10621 | 2  | 0.02 | 40                            |
| TCGA-AX-A05W | 4 | 4 | 4 | 4 | 6 | 4 | 4 | 6 | 6 MSS   | MSS   | 9710  | 2  | 0.02 | 61                            |
| TCGA-BG-A2AE | 4 | 4 | 4 | 4 | 6 | 6 | 5 | 6 | 5 MSS   | MSS   | 4611  | 1  | 0.02 | 67                            |
| TCGA-D1-A0ZV | 4 | 4 | 4 | 6 | 6 | 6 | 4 | 6 | 6 MSS   | MSS   | 10069 | 2  | 0.02 | 44                            |
| TCGA-D1-A16B | 4 | 4 | 4 | 4 | 4 | 6 | 6 | 6 | 6 MSS   | MSS   | 8767  | 2  | 0.02 | 57                            |
| TCGA-D1-A16Q | 4 | 4 | 4 | 4 | 6 | 6 | 6 | 6 | 6 MSS   | MSS   | 10799 | 2  | 0.02 | 33                            |
| TCGA-DI-A1NN | 4 | 4 | 4 | 4 | 6 | 6 | 5 | 6 | 5 MSS   | MSS   | 5386  | 1  | 0.02 | 61                            |
| TCGA-A5-A0GU | 4 | 4 | 4 | 4 | 4 | 4 | 5 | 6 | 4 MSS   | MSS   | 6953  | 1  | 0.01 | 50                            |
| TCGA-A5-A0VO | 6 | 4 | 4 | 4 | 6 | 6 | 6 | 6 | 6 MSS   | MSS   | 8671  | 1  | 0.01 | 80                            |
| TCGA-AP-A0LJ | 4 | 4 | 4 | 4 | 6 | 6 | 6 | 4 | 6 MSS   | MSS   | 9958  | 1  | 0.01 | 47                            |
| TCGA-BG-A0VV | 4 | 4 | 4 | 4 | 6 | 6 | 6 | 6 | 6 MSS   | MSS   | 11409 | 1  | 0.01 | 43                            |
| TCGA-BK-A0CA | 4 | 4 | 4 | 4 | 4 | 6 | 6 | 4 | 6 MSS   | MSS   | 9214  | 1  | 0.01 | 54                            |
| TCGA-BS-A0TG | 4 | 4 | 4 | 4 | 4 | 6 | 6 | 4 | 6 MSS   | MSS   | 9474  | 1  | 0.01 | 46                            |
| TCGA-D1-A17N | 4 | 4 | 4 | 4 | 6 | 6 | 6 | 6 | 4 MSS   | MSS   | 9469  | 1  | 0.01 | 33                            |
| TCGA-A5-A0GQ | 4 | 4 | 4 | 4 | 6 | 6 | 6 | 6 | 6 MSS   | MSS   | 10922 | 0  | 0    | 71                            |
| TCGA-B5-A0JS | 6 | 4 | 4 | 4 | 6 | 6 | 6 | 6 | 6 MSS   | MSS   | 8847  | 0  | 0    | 36                            |
| TCGA-B5-A11M | 4 | 4 | 4 | 4 | 4 | 6 | 6 | 6 | 6 MSS   | MSS   | 10309 | 0  | 0    | 35                            |
| TCGA-B5-A11X | 4 | 4 | 4 | 4 | 3 | 4 | 6 | 6 | 5 MSI-L | MSI-L | 9410  | 0  | 0    | 67                            |
| TCGA-BG-A0YU | 4 | 4 | 4 | 4 | 6 | 6 | 6 | 6 | 6 MSS   | MSS   | 8717  | 0  | 0    | 24                            |
| TCGA-BS-A0T9 | 4 | 4 | 4 | 4 | 6 | 6 | 4 | 6 | 6 MSS   | MSS   | 9230  | 0  | 0    | 64                            |
| TCGA-BS-A0TD | 4 | 4 | 4 | 4 | 4 | 4 | 6 | 6 | 6 MSS   | MSS   | 8608  | 0  | 0    | 40                            |
| TCGA-BS-A0V6 | 4 | 4 | 4 | 4 | 4 | 4 | 4 | 4 | 6 MSS   | MSS   | 10799 | 0  | 0    | 56                            |
| TCGA-BS-A0V7 | 4 | 4 | 4 | 4 | 6 | 6 | 6 | 6 | 6 MSS   | MSS   | 11366 | 0  | 0    | 42                            |
| TCGA-D1-A165 | 4 | 4 | 4 | 4 | 6 | 6 | 6 | 4 | 6 MSS   | MSS   | 8912  | 0  | 0    | 65                            |
| TCGA-D1-A16G | 4 | 4 | 4 | 4 | 6 | 4 | 5 | 6 | 5 MSS   | MSS   | 8870  | 0  | 0    | 37                            |
| TCGA-D1-A16X | 4 | 4 | 4 | 6 | 6 | 6 | 4 | 6 | 4 MSS   | MSS   | 8566  | 0  | 0    | 2250                          |
| TCGA-D1-A17C | 4 | 4 | 4 | 4 | 6 | 6 | 6 | 6 | 6 MSS   | MSS   | 7275  | 0  | 0    | 61                            |
